# Supplementary material for: MutationalPatterns: comprehensive genome-wide analysis of mutational processes
Source: PubMed Central journal article supplement (PMC5922316; doi:10.1186/s13073-018-0539-0), 2018-04-25
Supplement: 13073_2018_539_MOESM1_ESM.pdf [file 13073_2018_539_MOESM1_ESM.pdf]

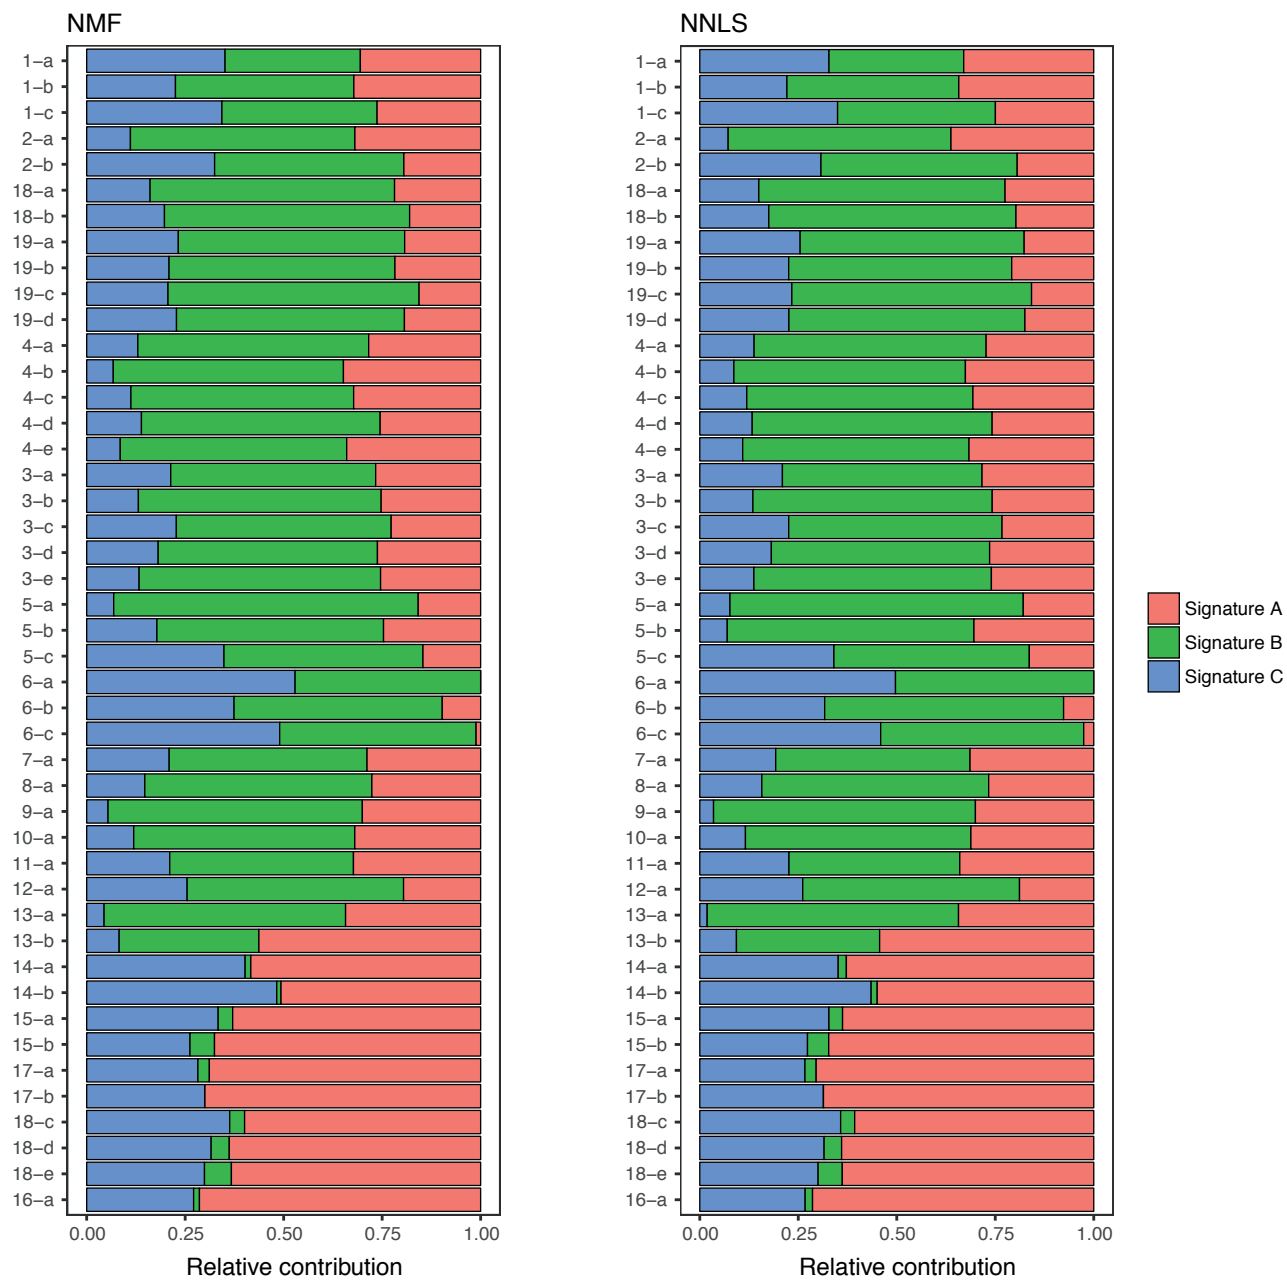

**Fig. S1 Signature contributions as estimated by NMF and NNLS.** Relative contribution of the three indicated mutational signatures (depicted in Fig. 1B) for each sample as estimated by NMF (left) and NNLS (right).

**A**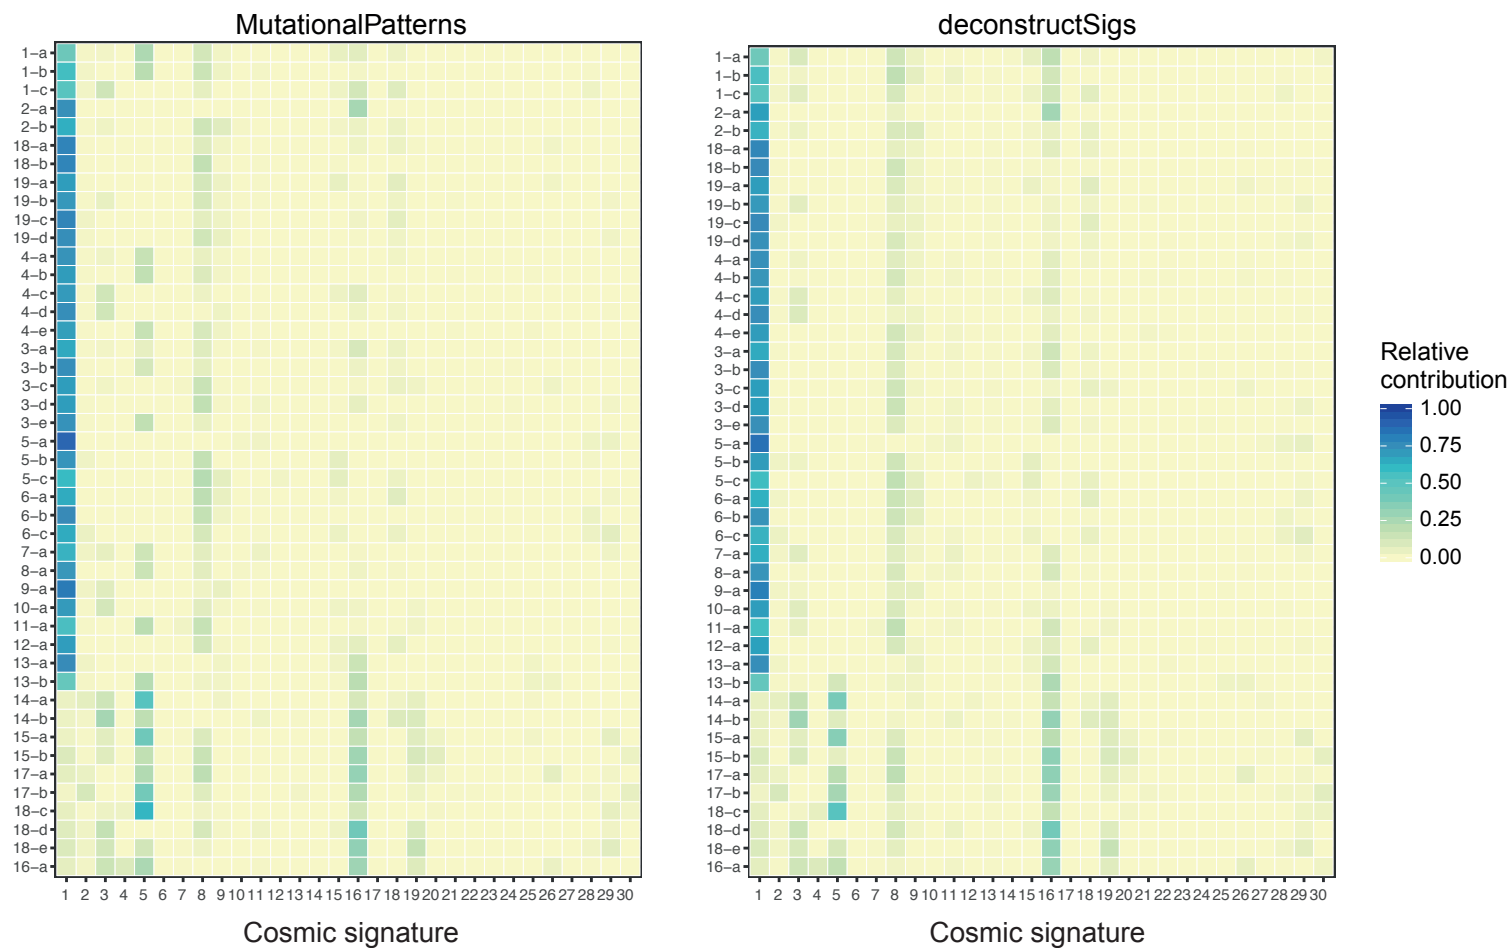**B**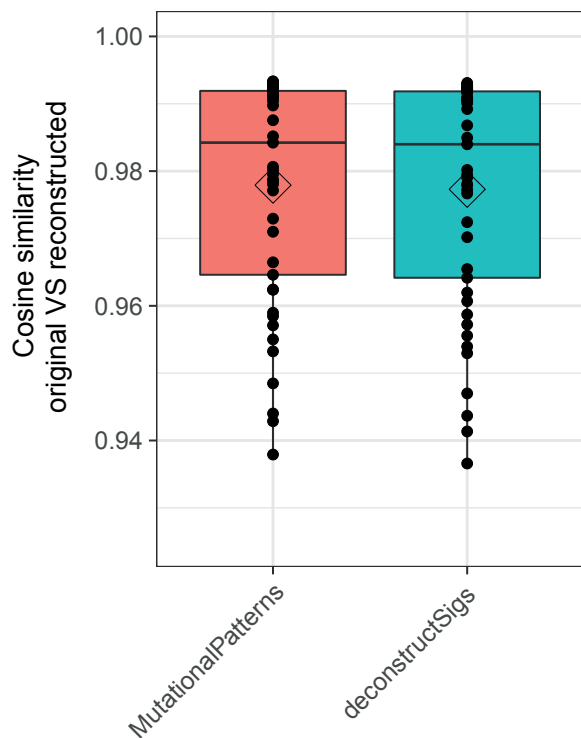**C**

|                                       | MutationalPatterns | deconstructSigs |
|---------------------------------------|--------------------|-----------------|
| COSMIC signatures similarity heatmap. | 0.1 s              | 42.5 s          |
| Runtime (45 VCFs)                     |                    |                 |

**Fig. S2 Comparison between MutationalPatterns (fit\_to\_signatures) and deconstructSigs (whichSignatures).** **a.** Relative contribution of all 30 COSMIC signatures for each sample, as found by MutationalPatterns (left) and deconstructSigs (right). **b.** Cosine similarity between the original and the reconstructed mutational profiles for MutationalPatterns and deconstructSigs. **c.** The runtime (elapsed time) in seconds to find the optimal linear combination of mutational signatures for 45 somatic mutation catalogs for both packages; MutationalPatterns is approximately 400 times faster than deconstructSigs.

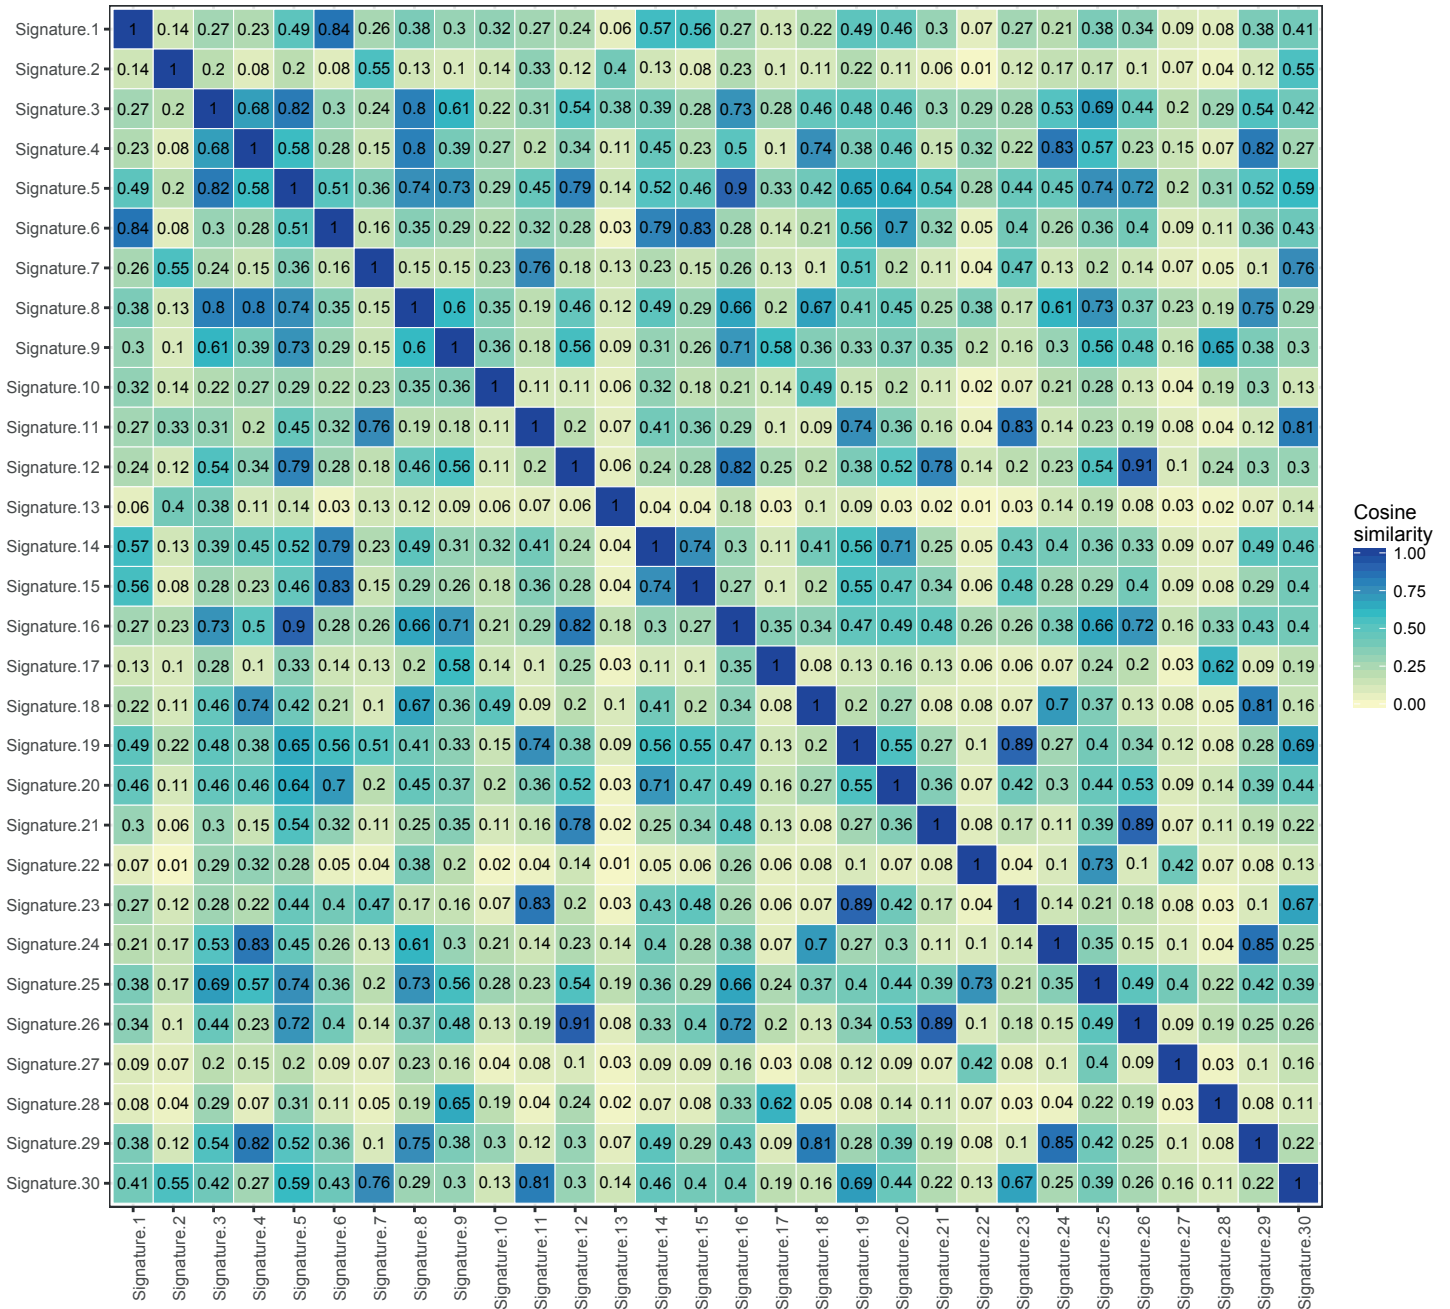

**Fig. S3 COSMIC signature similarities.** Heatmap with cosine similarities between all 30 COSMIC mutational signatures.
